# Supplementary material for: Combination of Cysteine and Glutathione Prevents Ethanol-Induced Hangover and Liver Damage by Modulation of Nrf2 Signaling in HepG2 Cells and Mice
Source: MDPI journal article supplement (doi:10.3390/antiox12101885), 2023-10-20
Supplement: s1 [file s1]

Table S1. Antioxidant activity of amino acids using ABTS radical scavenging assay

| Amino acids   | Antioxidant activity<br>( $\mu\text{g AEAC/mg of sample}$ ) |
|---------------|-------------------------------------------------------------|
| Asparagine    | $0.14 \pm 0.01$                                             |
| Alanine       | $0.09 \pm 0.02$                                             |
| Arginine      | $4.43 \pm 0.07$                                             |
| Aspartic acid | $0.12 \pm 0.08$                                             |
| Cysteine      | $870.84 \pm 9.20$                                           |
| Glutamine     | $0.02 \pm 0.03$                                             |
| Glutamic acid | $0.01 \pm 0.09$                                             |
| Glycine       | $0.08 \pm 0.04$                                             |
| Histidine     | $3.81 \pm 0.05$                                             |
| Isoleucine    | $0.76 \pm 0.02$                                             |
| Leucine       | $0.52 \pm 0.04$                                             |
| Methionine    | $0.14 \pm 0.02$                                             |
| Serine        | $0.09 \pm 0.04$                                             |
| Tryptophan    | $1.45 \pm 0.08$                                             |
| Tyrosine      | $0.20 \pm 0.09$                                             |
| Valine        | $0.58 \pm 0.03$                                             |

Values are expressed as mean  $\pm$  SD (n = 3). AEAC, ascorbic acid equivalent antioxidant capacity;

ABTS, 2,2'-azino-bis (3-ethylbenzothiazoline-6-sulfonic acid)
